# Supplementary material for: Edgeworthia gardneri (Wall.) Meisn. Ethanolic Extract Attenuates Endothelial Activation and Alleviates Cardiac Ischemia-Reperfusion Injury
Source: MDPI journal article supplement (doi:10.3390/molecules29051068), 2024-02-29
Supplement: s1 [file s1]

# ***Edgeworthia gardneri* (Wall.) Meisn. Ethanolic Extract Attenuates Endothelial Activation and Alleviates Cardiac Ischemia-Reperfusion Injury**

Xiaoya Lang <sup>1,†</sup>, Chao Zhong <sup>1,2,\*†</sup>, Lingqing Su <sup>1</sup>, Manman Qin <sup>1</sup>, Yanfei Xie <sup>1</sup>, Dan Shan <sup>2</sup>, Yaru Cui <sup>1,2</sup>, Min Shi <sup>1</sup>, Min Li <sup>3</sup>, Hexiu Quan <sup>1</sup>, Liang Qiu <sup>1</sup>, Guoyue Zhong <sup>3</sup> and Jun Yu <sup>2,\*</sup>

<sup>1</sup> Center for Translational Medicine, Jiangxi University of Chinese Medicine, Nanchang 330004, China; langxiaoya@jxutcm.edu.cn (X.L.); 13606525622@163.com (L.S.); 20142016@jxutcm.edu.cn (M.Q.); 20070945@jxutcm.edu.cn (Y.X.); cuiyaru@jxutcm.edu.cn (Y.C.); 20010381@jxutcm.edu.cn (M.S.); 20101063@jxutcm.edu.cn (H.Q.); 20091057@jxutcm.edu.cn (L.Q.)

<sup>2</sup> Department of Cardiovascular Sciences, Center for Metabolic Disease Research, Lewis Katz School of Medicine, Temple University, Philadelphia, PA 19140, USA; tuq93597@temple.edu

<sup>3</sup> Center for Traditional Chinese Medicine Resources and Ethnic Medicine, Jiangxi University of Chinese Medicine, Nanchang 330004, China; 20131004@jxutcm.edu.cn (M.L.); 20111025@jxutcm.edu.cn (G.Z.)

\* Correspondence: zhongchao21@163.com (C.Z.); jun.yu@temple.edu (J.Y.)

† These authors contributed equally to this work.

**Supplementary Table S1:** Chemicals and reagents used in this study

| <b>Chemicals/reagents</b>                        | <b>Cat number</b>            | <b>Company</b> |
|--------------------------------------------------|------------------------------|----------------|
| Ethanol                                          | 64-17-5                      | Xilong Science |
| Dimethyl sulfoxide (DMSO)                        | D8370                        | Solarbio       |
| 2,3,5-triphenyl tetrazolium chloride (TTC)       | T8170                        | Solarbio       |
| 10% Neutral Buffered Formalin Fixative           | G2162                        | Solarbio       |
| Hematoxylin                                      | 51275                        | Sigma-Aldrich  |
| Eosin                                            | E4009                        | Sigma-Aldrich  |
| MTT                                              | M5655                        | Sigma-Aldrich  |
| DAB Kit                                          | CW2069S                      | Cwbio          |
| Trizol                                           | 15596-018                    | Invitrogen     |
| PrimeScript™ RT Reagent Kit                      | RR047A                       | Takara         |
| SYBR Premix Ex Taq™ II                           | RR820A                       | Takara         |
| ECM culture medium                               | 1001-b, 0025, 1052, and 0503 | ScienCell      |
| RIPA buffer                                      | KGP703-100                   | KeyGen         |
| Protease inhibitors                              | E312-01                      | Vazyme         |
| Tumor necrosis factor- $\alpha$ (TNF- $\alpha$ ) | 300-01A                      | PeproTech      |

|                                                              |           |                           |
|--------------------------------------------------------------|-----------|---------------------------|
| BCA Protein Assay Kit                                        | 23225     | Thermo Fisher Scientific  |
| Anti-p65                                                     | 6956      | Cell Signaling Technology |
| Anti-p-p65                                                   | 3033      | Cell Signaling Technology |
| Anti-p38 MAPK                                                | 8690      | Cell Signaling Technology |
| Anti-p-p38 MAPK                                              | 9216      | Cell Signaling Technology |
| Anti-JNK                                                     | 9252      | Cell Signaling Technology |
| Anti-p-JNK                                                   | 9255      | Cell Signaling Technology |
| Anti-ERK                                                     | 4696      | Cell Signaling Technology |
| Anti-p-ERK                                                   | 9101      | Cell Signaling Technology |
| Anti-CD68                                                    | ab125212  | Abcam                     |
| IRDye® 800CW Donkey anti-rabbit IgG                          | 926-32213 | LI-COR                    |
| IRDye® 680RD Donkey anti-mouse IgG                           | 926-68072 | LI-COR                    |
| Alexa Fluor 594 Goat anti-Mouse IgG (H+L)                    | A-11005   | Invitrogen                |
| Horseradish peroxidase-conjugated goat anti-rabbit IgG (H+L) | SE134     | Solarbio                  |
| BAY11-7082                                                   | B5556     | Sigma-Aldrich             |
| SP600125                                                     | S5567     | Sigma-Aldrich             |
| PD98059                                                      | P215      | Sigma-Aldrich             |

|          |       |               |
|----------|-------|---------------|
| SB203580 | S8307 | Sigma-Aldrich |
|----------|-------|---------------|

**Supplementary Table S2:** Sequences of qRT-PCR primers used in this study

| Species | Genes                          | Primer sequences (5'-3')                                              |
|---------|--------------------------------|-----------------------------------------------------------------------|
| Rat     | <i>Tnf-<math>\alpha</math></i> | Forward: GTGATCGGTCCCAACAAGGA<br>Reverse: CTTGGTGGTTTGCTACGACG        |
|         | <i>Il-1<math>\beta</math></i>  | Forward: TGACTCGTGGGATGATGACG<br>Reverse: CAGCTCACATGGGTCAGACA        |
|         | <i>Il-6</i>                    | Forward: CCAGTTGCCTTCTTGGGACT<br>Reverse: CTGGTCTGTTGTGGGTGGTA        |
|         | <i>Icam-1</i>                  | Forward: ACCACGGAGCCAATTTCTCA<br>Reverse: TCGAGCTTCAGGACCCTAGT        |
|         | <i>Gapdh</i>                   | Forward: ACAGCAACAGGGTGGTGGAC<br>Reverse: TTTGAGGGTGCAGCGAACTT        |
| Human   | <i>TNF-<math>\alpha</math></i> | Forward: CCTCTCTCTAATCAGCCCTCTG<br>Reverse: GAGGACCTGGGAGTAGATGAG     |
|         | <i>IL-6</i>                    | Forward: ACTCACCTCTTCAGAACGAATTG<br>Reverse: CCATCTTTGGAAGGTTTCAGGTTG |
|         | <i>MCP-1</i>                   | Forward: TGTCCCAAAGAAGCTGTGATC<br>Reverse: ATTCTTGGGTTGTGGAGTGAG      |
|         | <i>VCAM-1</i>                  | Forward: TTTGACAGGCTGGAGATAGACT<br>Reverse: TCAATGTGTAATTTAGCTCGGCA   |
|         | <i>ICAM-1</i>                  | Forward: TTGGGCATAGAGACCCCGTT<br>Reverse: GCACATTGCTCAGTTCATACACC     |
|         | <i>GAPDH</i>                   | Forward: AGAAGGCTGGGGCTCATTTG<br>Reverse: AGGGGCCATCCACAGTCTTC        |

## Supplementary Figure S1

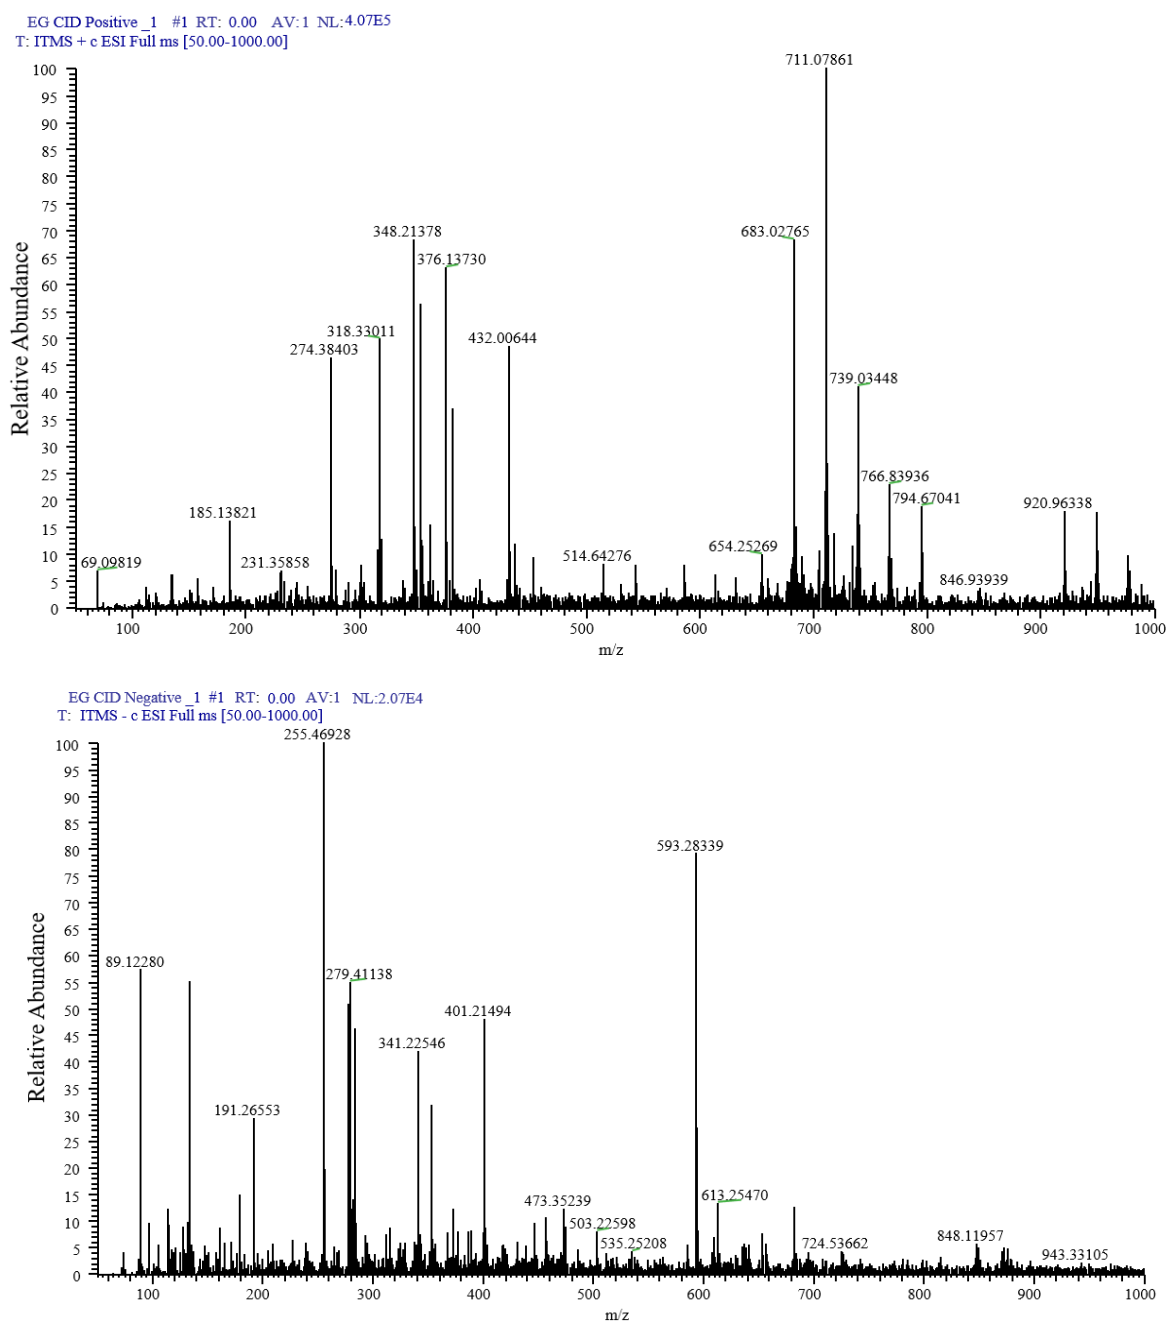

**Figure S1.** The total ion chromatogram of EG extract by ESI-MS. Upper: positive ionization mode; Lower: negative ionization mode.

## Supplementary Figure S2

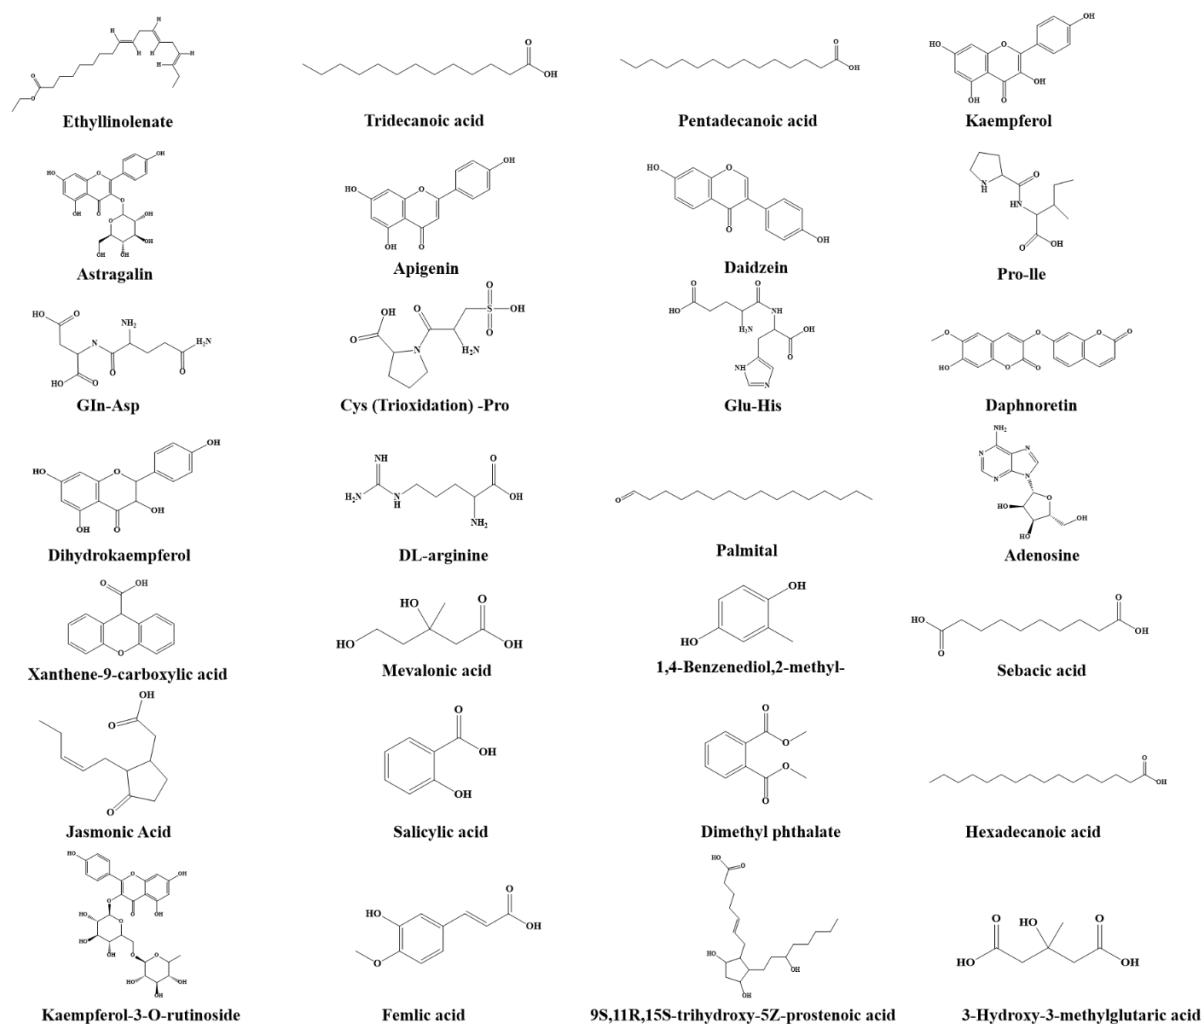

**Figure S2. The chemical structures of identified compounds in EG extract.**
